# Supplementary material for: Integrating images from multiple microscopy screens reveals diverse patterns of change in the subcellular localization of proteins
Source: eLife. 2018 Apr 5;7:e31872. doi: 10.7554/eLife.31872 (PMC5935485; doi:10.7554/eLife.31872)
Supplement: Supplementary file 1. — For all proteins within each cluster, we gave to a human evaluator the images for the untreated wild-type and a perturbation predicted to change by the protein localization change profiles of the cluster. The evaluator recorded the localization in the untreated wild-type, in the perturbation, and whether a localization change was visible. If the localization change was ambiguous, the evaluator recorded why they were not able to confirm the localization change. [file elife-31872-supp1.xlsx]

## Sheet: E
GENE	UNTREATED WILD-TYPE	RAPAMYCIN 60 MIN	LOCALIZATION CHANGE VISIBLE	CAUSE
MSN2	Cytoplasm and Rare Cytoplasm + Nucleus	Cytoplasm + Nucleus	YES
DOT6	Cytoplasm	Nucleus + Cytoplasm	YES
RTG3	Cytoplasm	Nucleus	YES
RTG1	Cytoplasm	Cytoplasm + Nucleus	YES
PWP1	Nucleolus	Nucleolus	AMBIGUOUS	Profiles suggest that largest bud cells change; WT shows many bud cells with cytoplasmic, but RAP has mostly nucleolar bud cells
YDL063C	Nucleus + Cytoplasm	Nucleus	YES
RRB1	Cytoplasm + Nucleolus	Nucleolus	YES
NAB2	Nucleus	Nucleus	NO	Possibly technical - nuclear patterns are more irregular in RAP
STB3	Cytoplasm and Rare Cytoplasm + Nucleus	Nucleus	YES
ENP1	Nucleolus	Nucleus + Nucleolus?	AMBIGUOUS	Indeterminate - nucleolus is brighter, but not sure if accompanied by localization change
TSR1	Cytoplasm and Rare Cytoplasm + Nucleus	Nucleus + Rare Cytoplasm and Nucleus	YES
UTP20	Cytoplasm + Nucleolus	Cytoplasm + Nucleolus	NO	Indeterminate - could be a proportion change, but not visible
YOR052C	Nucleus	Nucleus and Cytoplasm + Nucleus	AMBIGUOUS	Some visible differences, but too subtle to tell if this is real or not
YMR31	Mitochondria	Punctuate	YES
RPS23A	Cytoplasm	Cytoplasm	NO	Indeterminate - cytoplasmic signal is too bright
NRG1	Cytoplasm	Nucleus	AMBIGUOUS	Low expression makes it hard to tell
LSM12	Cytoplasm	Cytoplasm	NO	Technical - segmentation fault

## Sheet: F
GENE	UNTREATED WILD-TYPE	HU03	LOCALIZATION CHANGE VISIBLE	CAUSE
IML1	Vacuole Membrane	Vacuole Membrane	NO	Indeterminate
CCZ1	Punctuate	Punctuate	NO
TCO89	Vacuole Membrane	Vacuole Membrane	NO	Indeterminate
VAC14	Vacuole Membrane	Vacuole Membrane	AMBIGUOUS	Indeterminate - Vacuole Membrane Expression seems more punctuate
AKR2	Vacuole Membrane	Vacuole Membrane	AMBIGUOUS	WT image too noisy to tell
LSB3	Cytoplasm and Punctuate	Cytoplasm and Punctuate	NO	Indeterminate
POL12	Nucleus	Nucleus	AMBIGUOUS	Indeterminate - nuclear phenotype changes?
MCM7	Nucleus and Cytoplasm	Fluffy Nucleus	YES
SWI6	Fluffy Nucleus	Round Nucleus	AMBIGUOUS	Nuclear phenotype changes, but it's uncertain if this is a global effect or isolated to protein
YSH1	Nucleus	Irregular Nucleus	AMBIGUOUS	Indeterminate - nuclear phenotype changes?
CTF18	Nucleus	Nucleus	NO	Indeterminate - nuclear phenotype changes?
RPL7B	Cytoplasm and Rare Cytoplasm + Nucleus	Cytoplasm and Cytoplasm + Nucleus	AMBIGUOUS	Proportion seems to increase, but uncertain
YGR071C	Nucleus	Nucleus	AMBIGUOUS	Indeterminate - nuclear phenotype changes, possibly
RPH1	Round Nucleus	Fluffy Nucleus	AMBIGUOUS	Nuclear phenotype changes, but it's uncertain if this is a global effect or isolated to protein
DHR2	Nucleolus	Nucleolus	NO	Indeterminate
ERG6	Punctuate	Punctuate	NO	Indeterminate
BLM10	Noisy Image	Nucleus and Cytoplasm	AMBIGUOUS	WT image too noisy to tell
TMA16	Round Nucleus	Fluffy Nucleus	YES
RPA14	Nucleolus	Nucleolus	NO	Indeterminate

## Sheet: J
GENE	UNTREATED WILD-TYPE	RPD3 (1)	LOCALIZATION CHANGE VISIBLE	CAUSE
FAF1	Nucleolus	Nucleolus	NO	Could be intensity change
YEL020C	Low Expression	Cytoplasm	YES
UME1	Low Expression and Rare Nucleus	Nucleus	YES
ACS1	Low Expression	Nucleus	YES
RAD7	Low Expression and Rare Nucleus	Nucleus	YES
OGG1	Dim Nucleus	Nucleus	NO	Could be intensity change
YJR008W	Low Expression	Nucleus + Cytoplasm	YES
MNI1	Low Expression and Rare Nucleus	Nucleus	YES
PUS4	Low Expression and Rare Nucleus	Nucleus	YES
YCR061W	Low Expression	Vacuole and Punctuate	YES
PAB1	Low Expression Vacuole	Vacuole and Punctuate	YES
GAS3	Vacuole and ER + Vacuole	Vacuole + ER	YES
YLR194C	ER	ER and Vacuole	YES
MPD1	Low Expression	Dim Vacuole	Ambiguous	Could be intensity change
TGL1	Rare Punctuate	Frequent Punctuate	YES
YOR292C	Low Expression	Vacuole	YES
YDR115W	Low Expression	Vacuole	YES
MED8	Low Expression and Rare Nucleus	Nucleus	YES
CST26	Punctuate	Punctuate	NO	Could be more punctuate in RPD3
ERP1	ER + Vacuole	Vacuole	YES
ERP5	ER + Vacuole	Vacuole	YES
SCM3	Dim Nucleus	Nucleus	Ambiguous	Could be intensity change
CPR2	Low Expression	Vacuole	YES	Could be intensity change
YJL171C	ER and Vacuole	ER and Vacuole	Ambiguous	Seems to be more in vacuole
VPS29	Low Expression	Punctuate	Ambiguous	RPD3 expression is still fairly low

## Sheet: Q
GENE	UNTREATED WILD-TYPE	AF3	LOCALIZATION CHANGE VISIBLE	CAUSE
GYP5	Low Expression + Rare Bud Tip	Mating Projection	YES	Segmentation Error - Smoo is bud; does not impact conclusion, however
RGD2	Punctuate + Rare Bud Tip	Mating Projection	YES	Segmentation Error - Smoo is bud; does not impact conclusion, however
AVL9	Not Expressed + Rare Bud Tip	Mating Projection	YES	Segmentation Error - Smoo is bud; does not impact conclusion, however
GYL1	Cytoplasm + Rare Bud Tip	Cytoplasm + Mating Projection	YES	Segmentation Error - Smoo is bud; does not impact conclusion, however
YHR182W	Bud Neck	Mating Projection	YES	Segmentation Error - Smoo is bud; does not impact conclusion, however
APL2	Punctuate	Punctuate	AMBIGUOUS	Pattern is too complex
BCH1	Punctuate	Punctuate	AMBIGUOUS	Pattern is too complex

## Sheet: S
GENE	UNTREATED WILD-TYPE	HU03	LOCALIZATION CHANGE VISIBLE	CAUSE
SCW4	Vacuole	Unexpressed + Low Intensity Vacuole + Rare Vacuole	AMBIGUOUS	Caused by intensity drop
SKG1	Vacuole + Cell Membrane	Cell Membrane	YES
YMD8	Vacuole + Punctuate	Punctuate	YES
YJR054W	Vacuole	Indeterminate	AMBIGUOUS	Intensity in RAP is too low to tell
PHO91	ER + Vacuole	ER	YES
TAT2	Vacuole + Cell Membrane	Cell Membrane	YES
KRE2	Vacuole + Punctuate	Punctuate	YES
MNN2	Vacuole + Punctuate	Punctuate	YES
OCH1	Vacuole + Punctuate	Punctuate	YES
AMS1	Low Expression	Low Expression + Punctuate	YES	Rare phenotype - some cells show a punctuate expression
DIG2	Ambiguous	Ambiguous	NO	Intensity in both is too low to tell
GNT1	Vacuole	Indeterminate	AMBIGUOUS	Intensity in RAP is too low to tell
