# Supplementary material for: Integrating images from multiple microscopy screens reveals diverse patterns of change in the subcellular localization of proteins
Source: eLife. 2018 Apr 5;7:e31872. doi: 10.7554/eLife.31872 (PMC5935485; doi:10.7554/eLife.31872)
Supplement: Supplementary file 2. [file elife-31872-supp2.xlsx]

## Sheet: Sheet1
RPD3	RAP	HU	AF	IKI3
FAA4	RRP12	GIN4	BUD3	BNI5
YEH1	GCD7	HSL1	BUD4	CDC11
SOL4	MSN2	PGM2	HOF1	CDC10
ENA1	DOT6	SPE1	GIN4	OMA1
MYO3	RTG3	TIS11	HSL1	YIL083C
LIN1	RTG1	PBP1	BNR1	NGL1
YOR006C	PWP1	RAD54	MLC2	MSA2
IPL1	YDL063C	SPT21	MYO1	TRR2
YGR149W	RRB1	CDC7	BNI5	CWP1
SWD3	HMT1	CLB2	CDC11	ARO9
SED1	NAB2	CDC28	SHS1	SPL2
FAF1	STB3	RRP12	CDC10	YCR043C
YEL020C	ENP1	GCD7	TKL2	MEP1
UME1	TSR1	MSN2	YLF2	AIR1
ACS1	UTP20	DOT6	SEC13	CDC123
RAD7	YOR052C	RTG3	CDC24	RPS9A
OGG1	YMR31	RTG1	CRZ1	RPL13B
YJR008W	RPS23A	MSN2	GLN3	PAN6
MNI1	NRG1	DOT6	KAR4	ELP3
PUS4	LSM12	RTG3	AGA2	ARC1
YCR061W	GAT1	STB3	FUS1	RPS0B
PAB1	IRC4	ENP1	PRM2	RBG2
GAS3	BCP1	TSR1	STE2	COR1
YLR194C	POP7	TOF1	TIM17	YDR170W-A
MPD1	BGL2	TSL1	SWD1	ERG27
TGL1	YHR138C	GDB1	YNL134C	VPS74
YOR292C	DYN2	RNR3	SIT1	TRM7
YDR115W	MMF1	TGL5	YCT1	RPL27A
MED8	STF1	TGL4		BAP2
CST26	INH1	VPS68		HXT2
ERP1	EDC2	FAA4		UFD1
ERP5	PBI2	YEH1
SCM3	YDR063W	SOL4
CPR2	TGL5	ENA1
YJL171C	TGL4	TGL1
VPS29	VPS68	YDR090C
YNL181W	TGL1	SCW4
DID4	PET10	SKG1
RTT105	FMP42	YMD8
SKG6	TUB3	YJR054W
SSP120	DOT5	PHO91
PIN2	YKR011C	TAT2
BAP3	YOL048C	KRE2
KIP1	GSP2	MNN2
PHR1	YML108W	OCH1
HOR2	PKC1	AMS1
ACH1	YPR115W	DIG2
HSP42	SSZ1	GNT1
YNL305C	STR3	STE24
YOR352W	TRF5	FCY2
YKL151C	RPS10A
PET10	RPL23A
FMP42	RPL40B
TUB3	RPL40A
DOT5	SVS1
YKR011C	GPT2
YOL048C	VPS45
GSP2	CPT1
YML108W	EPT1
HAP3	AVT7
IES2	IPT1
YNL058C	SMF3
LHS1	PIR1
HNM1	YOR062C
MEP3	PRC1
SCW11	LAP4
YKL169C	AQR1
SRX1	BAP2
ARO9	ITR1
SPL2	HXT2
YCR043C	DIP5
MEP1	FUI1
YMR148W	HIP1
PEX2	YMR010W
DAD3	YMR253C
DAD2	UTH1
CSL4	LST4
BNA6	KEX2
BNA1	THI7
ADP1	YHL008C
RXT3	YDR090C
WSC3	SCW4
PRC1	SKG1
LAP4	YMD8
AQR1	YJR054W
BAP2	PHO91
ITR1	TAT2
HXT2	KRE2
DIP5	MNN2
YCT1	OCH1
PLB3	AMS1
CCC2	DIG2
	GNT1
	FLC1
	SLG1
	STE24
	FCY2
	HXT3
	AXL2
	STV1
	KEX1
