# Supplementary material for: Integrating images from multiple microscopy screens reveals diverse patterns of change in the subcellular localization of proteins
Source: eLife. 2018 Apr 5;7:e31872. doi: 10.7554/eLife.31872 (PMC5935485; doi:10.7554/eLife.31872)
Supplement: Table 1—source data 1. — For GO enrichments, we report the enriched term, the p-value, all proteins in the cluster annotated with the term, and the GO accession number. [file elife-31872-table1-data1.xlsx]

## Sheet: CLUSTERS
A	B	C	D	E	F	G	H	I	J	K	L	M	N	O	P	Q	R	S	T
YCL014W	YDR350C	YKR087C	YGR178C	YMR037C	YJR138W	YML100W	YGR282C	YMR246W	YIL019W	YOR352W	YIL079C	YNL299W	YNL232W	YPL163C	YLR414C	YPL249C	YMR297W	YGR279C	YAL041W
YJR092W	YMR105C	YIL083C	YGL163C	YER088C	YBR131W	YPR184W	YHR138C	YLL012W	YEL020C	YKL151C	YLR215C	YOR293W	YFR047C	YKR067W	YEL058W	YFL047W	YKL103C	YKR100C	YNL027W
YMR032W	YKL184W	YOL042W	YMR179W	YBL103C	YPL180W	YIL066C	YDR424C	YGR248W	YPL139C	YKR046C	YPL081W	YBL087C	YJR025C	YGL095C	YGR036C	YLR114C	YNL065W	YML038C	YER040W
YDR507C	YLR136C	YKR077W	YDL017W	YOL067C	YLR386W	YOR081C	YIL051C	YDR040C	YAL054C	YMR221C	YMR142C	YKR094C	YCR011C	YNL130C	YML055W	YMR192W	YBR068C	YJR054W	YCL055W
YKL101W	YBR117C	YHR106W	YPR119W	YLR196W	YOR034C	YKR089C	YDL130W-A		YJR052W	YML124C	YIL145C	YIL148W	YDL076C	YHR123W	YER064C	YHR182W	YDR497C	YNR013C	YGL032C
YIL159W	YHL014C	YKL096W	YBR160W	YDL063C	YFR024C-A	YOL129W	YDL181W		YML060W	YIL010W	YPL086C		YOL105C	YIL088C	YGR055W	YKL135C	YMR011W	YOL020W	YCL027W
YPR188C	YLR208W		YIL101C	YMR131C	YBL035C		YER035W		YJR008W	YKR011C	YGL105W			YDR072C	YKL212W	YMR237W	YPL265W	YDR483W	YIL037C
YHR023W			YPL012W	YBR034C	YBR202W		YNL015W		YIL110W	YOL048C	YLR048W							YBR015C	YFL026W
YNL166C			YIL069C	YGL122C	YLR182W		YDR063W		YNL292W	YOR185C	YGR173W							YGL038C	YJL143W
YJR076C			YLR291C	YDR169C	YLR277C				YCR061W	YML108W	YBL045C							YGL156W
YDL225W			YHR025W	YBR247C	YMR078C				YER165W									YDR480W
YCR002C				YDL060W	YPL198W				YMR215W									YOR320C
				YBL004W	YGR071C				YLR194C
				YOR052C	YER169W				YOR288C
				YFR049W	YKL078W				YKL140W
				YGR118W	YML008C				YOR292C
				YDR043C	YFL007W				YDR115W
				YHR121W	YOR252W				YBR193C
					YDR156W				YBR042C
									YAR002C-A
									YHR110W
									YDL139C
									YHR057C
									YJL171C
									YHR012W

## Sheet: GO ENRICHMENTS
Cluster	Biological Process (Benjamini-Hochberg, P = 0.05)	P-Value	Proteins	GO Accession		Cellular Compartment (Benjamini-Hochberg, P = 0.05)	P-Value	Proteins	GO Accession		Molecular Function (Benjamini-Hochberg, P = 0.05)	P-Value	Proteins	GO Accession		Manual	Examples
A	cytoskeleton-dependent cytokinesis	3.76632e-07	YCL014W,YCR002C,YDL225W,YHR023W,YJR076C,YJR092W,YMR032W,YPR188C	GO:0061640		cell division site	3.01784e-14	YCL014W,YCR002C,YDL225W,YHR023W,YIL159W,YJR076C,YJR092W,YKL101W,YMR032W,YNL166C,YPR188C	GO:0032153
	cytokinesis	1.35878e-06	YCL014W,YCR002C,YDL225W,YHR023W,YJR076C,YJR092W,YMR032W,YPR188C	GO:0000910		cellular bud neck	1.60881e-12	YCL014W,YCR002C,YDL225W,YDR507C,YHR023W,YIL159W,YJR076C,YJR092W,YKL101W,YMR032W,YNL166C,YPR188C	GO:0005935
	cell cycle	9.20671e-05	YCL014W,YCR002C,YDL225W,YDR507C,YHR023W,YJR076C,YJR092W,YKL101W,YMR032W,YNL166C,YPR188C	GO:0007049		cell division site part	2.95035e-12	YCL014W,YCR002C,YDL225W,YHR023W,YJR076C,YJR092W,YKL101W,YMR032W,YNL166C,YPR188C	GO:0032155
	cell division	0.000101263	YCL014W,YCR002C,YDL225W,YDR507C,YHR023W,YJR076C,YJR092W,YMR032W,YPR188C	GO:0051301		cellular bud	2.30703e-11	YCL014W,YCR002C,YDL225W,YDR507C,YHR023W,YIL159W,YJR076C,YJR092W,YKL101W,YMR032W,YNL166C,YPR188C	GO:0005933
	septin ring organization	0.000173848	YCR002C,YDL225W,YDR507C,YJR092W,YNL166C	GO:0031106		site of polarized growth	9.86584e-11	YCL014W,YCR002C,YDL225W,YDR507C,YHR023W,YIL159W,YJR076C,YJR092W,YKL101W,YMR032W,YNL166C,YPR188C	GO:0030427
	mitotic cytokinesis	0.000631455	YCL014W,YCR002C,YDL225W,YJR076C,YJR092W,YMR032W	GO:0000281		septin ring	9.0914e-10	YCR002C,YDL225W,YJR076C,YJR092W,YKL101W,YMR032W,YNL166C	GO:0005940
	septin cytoskeleton organization	0.000648065	YCR002C,YDL225W,YDR507C,YJR092W,YNL166C	GO:0032185		septin cytoskeleton	3.90422e-09	YCR002C,YDL225W,YJR076C,YJR092W,YKL101W,YMR032W,YNL166C	GO:0032156
	cytoskeleton organization	0.000970233	YCR002C,YDL225W,YDR507C,YHR023W,YIL159W,YJR092W,YMR032W,YNL166C	GO:0007010		cell cortex part	4.06613e-08	YCL014W,YCR002C,YDL225W,YHR023W,YJR076C,YJR092W,YKL101W,YMR032W,YNL166C,YPR188C	GO:0044448
	septin ring assembly	0.00105229	YCR002C,YDL225W,YDR507C,YNL166C	GO:0000921		cellular bud neck septin ring	4.57941e-08	YCR002C,YDL225W,YJR076C,YKL101W,YMR032W,YNL166C	GO:0000144
	cell cycle process	0.00114099	YCL014W,YCR002C,YDL225W,YDR507C,YHR023W,YJR076C,YJR092W,YKL101W,YMR032W,YPR188C	GO:0022402		cytoskeletal part	8.93536e-08	YCL014W,YCR002C,YDL225W,YHR023W,YJR076C,YJR092W,YKL101W,YMR032W,YNL166C,YPR188C	GO:0044430
	cytokinetic process	0.0144352	YDL225W,YHR023W,YMR032W,YPR188C	GO:0032506		cytoskeleton	1.65473e-07	YCL014W,YCR002C,YDL225W,YHR023W,YJR076C,YJR092W,YKL101W,YMR032W,YNL166C,YPR188C	GO:0005856
	mitotic cell cycle process	0.0220107	YCL014W,YCR002C,YDL225W,YDR507C,YJR076C,YJR092W,YKL101W,YMR032W	GO:1903047		cellular bud neck septin structure	1.98889e-07	YCR002C,YDL225W,YJR076C,YKL101W,YMR032W,YNL166C	GO:0000399
	mitotic cell cycle	0.0250321	YCL014W,YCR002C,YDL225W,YDR507C,YJR076C,YJR092W,YKL101W,YMR032W	GO:0000278		cleavage apparatus septin structure	1.98889e-07	YCR002C,YDL225W,YJR076C,YKL101W,YMR032W,YNL166C	GO:0032161
	protein localization to bud neck	0.0360853	YDL225W,YJR076C,YJR092W	GO:0097271		cell cortex	3.69075e-07	YCL014W,YCR002C,YDL225W,YHR023W,YJR076C,YJR092W,YKL101W,YMR032W,YNL166C,YPR188C	GO:0005938
						cytoplasmic region	3.69075e-07	YCL014W,YCR002C,YDL225W,YHR023W,YJR076C,YJR092W,YKL101W,YMR032W,YNL166C,YPR188C	GO:0099568
						cellular bud neck contractile ring	7.63252e-05	YCL014W,YHR023W,YJR092W,YMR032W,YPR188C	GO:0000142
						actomyosin contractile ring	0.00035174	YCL014W,YHR023W,YJR092W,YMR032W,YPR188C	GO:0005826
						contractile ring	0.00035174	YCL014W,YHR023W,YJR092W,YMR032W,YPR188C	GO:0070938
						actin cytoskeleton	0.0025815	YCL014W,YHR023W,YJR092W,YMR032W,YPR188C	GO:0015629
						cell periphery	0.008922	YCL014W,YCR002C,YDL225W,YHR023W,YJR076C,YJR092W,YKL101W,YMR032W,YNL166C,YPR188C	GO:0071944
B																Sugar Metabolism	TKL2, PGM2
C
D																Cell Division Cycle (Distinct from A)	CDC28, CDC7, CLB7
E	RNA metabolic process	0.000669859	YBL004W,YBL103C,YBR034C,YBR247C,YDL060W,YDR043C,YDR169C,YER088C,YGL122C,YGR118W,YHR121W,YLR196W,YMR037C,YMR131C,YOL067C	GO:0016070		nucleus	0.0128853	YBL004W,YBL103C,YBR034C,YBR247C,YDL060W,YDL063C,YDR043C,YDR169C,YER088C,YGL122C,YHR121W,YLR196W,YMR037C,YMR131C,YOL067C,YOR052C	GO:0005634							Stress-Responsive Transcription Factors	MSN2, DOT6, RTG1, RTG3
	nucleic acid metabolic process	0.00706911	YBL004W,YBL103C,YBR034C,YBR247C,YDL060W,YDR043C,YDR169C,YER088C,YGL122C,YGR118W,YHR121W,YLR196W,YMR037C,YMR131C,YOL067C	GO:0090304
	gene expression	0.034594	YBL004W,YBL103C,YBR034C,YBR247C,YDL060W,YDR043C,YDR169C,YER088C,YFR049W,YGL122C,YGR118W,YLR196W,YMR037C,YMR131C,YOL067C	GO:0010467
	nucleobase-containing compound metabolic process	0.0475281	YBL004W,YBL103C,YBR034C,YBR247C,YDL060W,YDR043C,YDR169C,YER088C,YGL122C,YGR118W,YHR121W,YLR196W,YMR037C,YMR131C,YOL067C	GO:0006139
F						extrinsic component of vacuolar membrane	0.0288227	YJR138W,YLR386W,YPL180W	GO:0000306							DNA replication (Differentiated from A)	POL12, MCM7, CTF18
G											triglyceride lipase activity	0.0292391	YKR089C,YOR081C	GO:0004806		Metabolism	TGL4, TGL5, RNR3, GDB1
H	negative regulation of hydrolase activity	0.000270287	YDL130W-A,YDL181W,YHR138C,YNL015W	GO:0051346							enzyme inhibitor activity	0.00144118	YDL130W-A,YDL181W,YHR138C,YNL015W	GO:0004857
	negative regulation of catalytic activity	0.0356256	YDL130W-A,YDL181W,YHR138C,YNL015W	GO:0043086
	negative regulation of molecular function	0.0356256	YDL130W-A,YDL181W,YHR138C,YNL015W	GO:0044092
																Lipid Metabolism	YEH1, FAA4
I
																Annoted by Chong et al. to move out of cytoplasm	ACS1, RAD7, MNI1, YJR008W, YCR061W, PAB1, PUS4, YOR292C
J
K
																Some ribosomal subunits	RPS9A, RPL13B, RPS0B
L
M						cytosolic ribosome	0.0108795	YBL087C,YIL148W,YKR094C,YOR293W	GO:0022626		protein tag	0.0292391	YIL148W,YKR094C	GO:0031386		Some ribosomal subunits	RPL23A, RPL40A, RPL40B, RPS10A
						cytosolic part	0.0248081	YBL087C,YIL148W,YKR094C,YOR293W	GO:0044445
						ribosomal subunit	0.0489718	YBL087C,YIL148W,YKR094C,YOR293W	GO:0044391
N	'de novo' NAD biosynthetic process from tryptophan	0.0485175	YFR047C,YJR025C	GO:0034354
O											diacylglycerol cholinephosphotransferase activity	0.0438586	YHR123W,YNL130C	GO:0004142		Phospholipid metabolism	IPT1, EPT1, GPT2, CPT1
P
Q	Golgi vesicle transport	0.00543479	YKL135C,YLR114C,YMR192W,YMR237W,YPL249C	GO:0048193		cellular bud tip	9.27864e-06	YFL047W,YHR182W,YLR114C,YMR192W,YPL249C	GO:0005934		GTPase regulator activity	0.00931665	YFL047W,YMR192W,YPL249C	GO:0030695
						Golgi-associated vesicle	1.73576e-05	YKL135C,YMR192W,YMR237W,YPL249C	GO:0005798		GTPase activator activity	0.0140957	YFL047W,YMR192W,YPL249C	GO:0005096
						cellular bud	0.00066195	YFL047W,YHR182W,YLR114C,YMR192W,YPL249C	GO:0005933		GTPase binding	0.0140957	YMR192W,YMR237W,YPL249C	GO:0051020
						site of polarized growth	0.000767361	YFL047W,YHR182W,YLR114C,YMR192W,YPL249C	GO:0030427		small GTPase binding	0.0220909	YMR192W,YMR237W,YPL249C	GO:0031267
						cellular bud neck	0.00604815	YFL047W,YLR114C,YMR192W,YPL249C	GO:0005935		nucleoside-triphosphatase regulator activity	0.026747	YFL047W,YMR192W,YPL249C	GO:0060589
						Golgi apparatus part	0.00714343	YKL135C,YMR192W,YMR237W,YPL249C	GO:0044431
						vesicle	0.0105739	YKL135C,YMR192W,YMR237W,YPL249C	GO:0031982
						Golgi apparatus	0.0120611	YKL135C,YMR192W,YMR237W,YPL249C	GO:0005794
						trans-Golgi network transport vesicle	0.012201	YKL135C,YMR237W	GO:0030140
						cytoplasmic vesicle	0.0126471	YKL135C,YMR192W,YMR237W,YPL249C	GO:0031410
						intracellular vesicle	0.0126471	YKL135C,YMR192W,YMR237W,YPL249C	GO:0097708
						clathrin-coated vesicle	0.0272003	YKL135C,YMR237W	GO:0030136
R						vacuole	9.39028e-05	YBR068C,YDR497C,YKL103C,YMR011W,YMR297W,YNL065W,YPL265W	GO:0005773		secondary active transmembrane transporter activity	0.0179095	YBR068C,YDR497C,YMR011W,YPL265W	GO:0015291
						storage vacuole	0.00176961	YDR497C,YKL103C,YMR011W,YMR297W,YNL065W,YPL265W	GO:0000322		ion transmembrane transporter activity	0.0205849	YBR068C,YDR497C,YMR011W,YNL065W,YPL265W	GO:0015075
						lytic vacuole	0.00176961	YDR497C,YKL103C,YMR011W,YMR297W,YNL065W,YPL265W	GO:0000323
						fungal-type vacuole	0.00176961	YDR497C,YKL103C,YMR011W,YMR297W,YNL065W,YPL265W	GO:0000324
						integral component of plasma membrane	0.0142067	YBR068C,YDR497C,YMR011W,YPL265W	GO:0005887
						intrinsic component of plasma membrane	0.0281546	YBR068C,YDR497C,YMR011W,YPL265W	GO:0031226
S	protein glycosylation	0.0207859	YBR015C,YDR483W,YGL038C,YOR320C	GO:0006486		Golgi membrane	0.0257652	YBR015C,YDR483W,YGL038C,YML038C,YOR320C	GO:0000139		transferase activity, transferring hexosyl groups	0.0238479	YBR015C,YDR483W,YGL038C,YOR320C	GO:0016758
	glycoprotein metabolic process	0.0207859	YBR015C,YDR483W,YGL038C,YOR320C	GO:0009100		bounding membrane of organelle	0.0277612	YBR015C,YDR483W,YGL038C,YGL156W,YJR054W,YML038C,YNR013C,YOR320C	GO:0098588
	glycoprotein biosynthetic process	0.0207859	YBR015C,YDR483W,YGL038C,YOR320C	GO:0009101		vacuole	0.0470026	YDR483W,YGL156W,YGR279C,YJR054W,YNR013C,YOL020W,YOR320C	GO:0005773
	macromolecule glycosylation	0.0207859	YBR015C,YDR483W,YGL038C,YOR320C	GO:0043413
	glycosylation	0.0207859	YBR015C,YDR483W,YGL038C,YOR320C	GO:0070085
T	cellular response to pheromone	0.000537368	YCL027W,YCL055W,YFL026W,YGL032C,YNL027W	GO:0071444
	response to pheromone	0.000702881	YCL027W,YCL055W,YFL026W,YGL032C,YNL027W	GO:0019236
	cellular response to organic substance	0.00100147	YCL027W,YCL055W,YER040W,YFL026W,YGL032C,YNL027W	GO:0071310
	response to organic substance	0.00481703	YCL027W,YCL055W,YER040W,YFL026W,YGL032C,YNL027W	GO:0010033
	conjugation with cellular fusion	0.0067127	YCL027W,YCL055W,YFL026W,YGL032C,YIL037C	GO:0000747
	conjugation	0.0078841	YCL027W,YCL055W,YFL026W,YGL032C,YIL037C	GO:0000746
	multi-organism cellular process	0.0107127	YCL027W,YCL055W,YFL026W,YGL032C,YIL037C	GO:0044764
	cellular response to chemical stimulus	0.0485641	YCL027W,YCL055W,YER040W,YFL026W,YGL032C,YNL027W	GO:0070887
